# Supplementary material for: Automatic Suppression Reduces Anxiety-Related Overestimation of Time Perception
Source: Front Physiol. 2020 Oct 22;11:537778. doi: 10.3389/fphys.2020.537778 (PMC7642764; doi:10.3389/fphys.2020.537778)
Supplement: Supplementary file 1 [file Table_1.XLSX]

## Sheet: Sheet1
ID	gender（1=male，0=female）	age（year）	trait-anxiety	group	neutral pse	negative pse	pse Neu-Neg	avgAousal.neg	avgAousal.neu	avgAousalneg-neu
1	1	22	61	deliberate suppression	555.273	592.557	-37.2845	6.4375	3.6875	2.75
2	1	19	52	deliberate suppression	943.102	842.4	100.703	6.125	2.9375	3.1875
3	1	22	52	automatic baseline	1006.78	801.064	205.717	6.4375	3.3125	3.125
4	1	19	47	deliberate baseline	854.942	816.365	38.5762	6.625	3.25	3.375
5	0	24	52	deliberate baseline	911.147	900.331	10.8159	6.3125	3.9375	2.375
6	1	27	54	automatic baseline	1135.05	1131.85	3.20306	5.875	3.25	2.625
7	1	26	58	deliberate baseline	947.896	910.56	37.3358	5.9375	3.3125	2.625
8	1	29	58	automatic baseline	935.567	707.642	227.925	6.25	3.5625	2.6875
9	0	27	65	deliberate suppression	717.342	499.966	217.376	7.3125	3.9375	3.375
11	0	24	53	automatic suppression·	1096.36	1100.13	-3.77321	3.8125	3.25	0.5625
13	0	23	60	deliberate suppression	1321.99	1125.41	196.583	6.25	3.3125	2.9375
14	0	20	50	deliberate baseline	627.433	609.787	17.6459	5.625	3.9375	1.6875
15	0	22	52	deliberate suppression	1152.52	1122.58	29.9355	6.3125	4.0625	2.25
16	1	22	54	automatic suppression·	764.135	743.37	20.7657	4.75	3.1875	1.5625
18	0	21	51	deliberate baseline	1014.52	1008.5	6.01579	5.4375	3	2.4375
19	0	21	58	automatic baseline	870.907	842.023	28.8832	6.125	4.125	2
20	0	22	50	deliberate baseline	1044.75	1013.29	31.4515	6.125	3.125	3
21	0	26	63	automatic suppression·	883.731	904.334	-20.603	4.5625	3.5625	1
22	0	21	52	deliberate suppression	872.779	921.364	-48.5854	6.25	3.375	2.875
23	0	23	60	deliberate baseline	884.144	848.751	35.3934	6.875	3.375	3.5
24	0	20	45	deliberate suppression	862.219	819.038	43.1813	5.875	3.6875	2.1875
26	1	27	49	automatic suppression·	872.571	902.242	-29.6717	5	3.1875	1.8125
27	1	22	47	deliberate suppression	807.294	830.19	-22.8955	5.4375	3.1875	2.25
28	0	20	61	automatic suppression·	981.527	1011.69	-30.1594	4.1875	3.25	0.9375
29	0	20	64	automatic suppression·	965.063	1002.42	-37.3551	4.625	3.0625	1.5625
30	1	21	56	deliberate suppression	1052.94	758.925	294.014	6.75	3.4375	3.3125
31	0	22	50	deliberate baseline	947.598	912.644	34.9533	6.1875	3.5625	2.625
32	0	21	62	automatic baseline	1074.6	964.607	109.994	6.0625	3.25	2.8125
33	0	20	57	automatic baseline	1123.53	1101.23	22.2987	6.1875	3.3125	2.875
35	0	19	58	deliberate suppression	1142.46	1199.33	-56.8769	5.8125	3.75	2.0625
36	1	21	53	deliberate suppression	980.066	992.111	-12.0455	6.5625	3.1875	3.375
37	0	24	55	deliberate suppression	955.827	785.78	170.048	6.875	3.3125	3.5625
40	0	22	56	automatic suppression·	1007.72	1010.69	-2.97907	5	3.625	1.375
41	0	19	48	deliberate baseline	792.916	770.616	22.3008	5.5625	3.0625	2.5
42	1	23	55	automatic baseline	870.97	910.579	-39.6083	6.125	3.1875	2.9375
43	0	23	58	automatic baseline	1007.06	1000.75	6.30707	5.375	3.25	2.125
46	1	29	57	automatic suppression·	983.014	983	0.0140859	4.6875	3.875	0.8125
47	0	24	58	automatic baseline	652.22	589.468	62.752	6.6875	3.6875	3
48	1	22	51	deliberate baseline	1059.96	990.858	69.1004	6.125	3.5625	2.5625
50	0	20	56	deliberate baseline	1072.33	999.391	72.9405	6.25	3.125	3.125
51	0	21	52	automatic baseline	957.675	947.585	10.0901	6.1875	3.25	2.9375
52	1	22	54	automatic suppression·	1005.95	914.294	91.6586	4.75	2.875	1.875
53	0	27	62	automatic suppression·	1036.12	1083.35	-47.2364	4.625	3.3125	1.3125
54	1	23	57	deliberate baseline	782.994	773.094	9.9001	5.6875	3.375	2.3125
55	0	28	52	automatic baseline	902.503	714.291	188.212	7.0625	3.0625	4
56	0	24	45	automatic suppression·	1074.66	1093.81	-19.1518	4.6875	3.1875	1.5
57	0	20	58	automatic baseline	1101.79	968.56	133.226	6.1875	3.625	2.5625
58	0	20	58	deliberate suppression	884.927	938.711	-53.784	6.1875	3.25	2.9375
59	0	21	56	automatic suppression·	998.08	825.004	173.076	4.75	3.125	1.625
60	0	20	50	automatic baseline	789.643	807.515	-17.8724	6.1875	3.25	2.9375
61	1	22	56	automatic baseline	665.191	728.499	-63.3079	5.6875	3.25	2.4375
62	1	22	63	automatic baseline	765.197	805.138	-39.9417	5.25	3.4375	1.8125
63	0	25	56	deliberate baseline	829.412	811.999	17.4125	6.375	3.4375	2.9375
65	0	20	58	deliberate suppression	891.197	885.731	5.46596	5.875	3.75	2.125
74	1	25	56	deliberate baseline	667.746	624.769	42.9777	6	3.4375	2.5625
75	0	19	50	deliberate suppression	896.041	834.767	61.2737	6.8125	3.125	3.6875
81	0	21	58	automatic suppression·	808.417	842.615	-34.1984	4.1875	3.3125	0.875
83	1	20	55	deliberate baseline	906.257	850.804	55.4522	6.5	3.6875	2.8125
86	0	21	51	deliberate baseline	815.677	627.337	188.34	6.1875	3.5	2.6875
88	0	26	51	automatic suppression·	599.824	630.906	-31.0823	4.9375	3.375	1.5625
91	0	24	52	deliberate suppression	854.106	636.952	217.154	6.5625	3.5	3.0625
92	1	25	52	automatic baseline	1038.24	1035.82	2.42829	5.75	3.875	1.875
94	0	22	50	automatic baseline	998.458	887.774	110.684	6.125	3.5625	2.5625
95	0	29	67	deliberate baseline	994.36	894.633	99.7271	6.625	3.125	3.5
96	1	20	60	automatic suppression·	886.943	881.802	5.14149	5.0625	3	2.0625
98	1	25	51	automatic suppression·	739.456	770.89	-31.4332	4.625	3.3125	1.3125
99	0	20	62	deliberate suppression	970.6	927.888	42.7118	6	3.375	2.625
100	1	21	53	automatic suppression·	801.568	840.281	-38.7126	4.4375	3.0625	1.375
103	0	27	52	automatic suppression·	1126.69	1140.46	-13.775	4.9375	3.4375	1.5
105	1	22	48	automatic baseline	687.524	699.999	-12.4757	5.9375	3.3125	2.625
107	0	22	55	deliberate baseline	1057.01	948.768	108.24	5.9375	4	1.9375
108	0	21	46	deliberate suppression	783.09	711.386	71.7044	6.5625	3.5625	3
109	0	19	58	deliberate baseline	687.311	742.489	-55.1776	5.125	3.1875	1.9375
110	0	25	57	automatic baseline	1090.94	987.087	103.855	6.4375	3.75	2.6875
111	1	22	49	deliberate suppression	687.097	738.487	-51.3896	5.75	3.125	2.625
112	0	21	50	deliberate baseline	1199.55	1075.9	123.653	6.1875	3.4375	2.75
114	0	22	52	automatic suppression·	764.588	700.896	63.6914	4.5	3.75	0.75
115	1	21	50	automatic suppression·	875.785	895.069	-19.2845	4.125	3.5	0.625
117	0	23	55	deliberate baseline	890.931	862.937	27.9934	5.375	3.4375	1.9375
118	0	22	52	deliberate suppression	853.245	882.779	-29.5342	6.3125	3.1875	3.125
121	0	21	51	automatic baseline	807.811	782.874	24.9374	6.5	3.0625	3.4375
122	0	21	51	deliberate suppression	892.432	860.937	31.4952	5.4375	3.4375	2
123	0	21	68	automatic baseline	800.364	773.094	27.2696	5.9375	3	2.9375
124	1	23	51	automatic suppression·	918.463	888.189	30.2741	4.1875	3.3125	0.875
201	1	31	56	deliberate suppression	1051.77	843.956	207.813	6.1875	3.3125	2.875
202	0	28	47	deliberate baseline	1110.05	1017.73	92.32	6	3.25	2.75
205	1	28	51	automatic baseline	839.519	1018.61	-179.087	4.9375	3.5	1.4375
206	1	29	59	deliberate baseline	873.25	976.284	-103.034	6.6875	4	2.6875
207	1	29	64	deliberate baseline	859.91	767.504	92.4055	6.0625	3.25	2.8125
208	0	28	44	automatic baseline	931.145	784.03	147.115	6.0625	3.5	2.5625
209	0	30	54	automatic baseline	842.664	633.937	208.726	6.125	3.25	2.875
210	0	26	61	automatic baseline	879.482	652.373	227.109	6.375	3.4375	2.9375
212	1	31	66	automatic suppression·	846.047	1034.55	-188.5	4.875	3.5625	1.3125
213	1	26	50	deliberate suppression	923.875	1074.74	-150.866	6.1875	3.5625	2.625
214	0	30	49	automatic baseline	852.489	868.069	-15.5797	6.0625	3.5	2.5625
215	0	28	63	automatic suppression·	668.784	861.288	-192.504	4.8125	3.4375	1.375
221	0	28	52	deliberate baseline	757.422	1009.72	-252.293	4.75	3.4375	1.3125
222	0	28	48	automatic suppression·	759.992	730.944	29.0479	6	3.8125	2.1875
223	1	29	45	deliberate suppression	608.392	678.249	-69.8573	4.75	3.1875	1.5625
224	1	28	60	deliberate suppression	1303.59	1019.42	284.167	6.0625	3.375	2.6875
225	0	24	46	deliberate baseline	1345.59	918.94	426.646	6.0625	3.5	2.5625
226	0	29	62	deliberate suppression	923.638	948.427	-24.789	6.1875	3.9375	2.25
229	1	30	55	automatic suppression·	938.86	833.704	105.156	6.4375	3.9375	2.5
230	0	25	53	automatic suppression·	930.295	795.881	134.414	6.1875	3.25	2.9375
